# Supplementary material for: Staffing and Antipsychotic Medication Use in Nursing Homes and Neighborhood Deprivation
Source: PubMed Central journal article supplement (PMC11043897; doi:10.1001/jamanetworkopen.2024.8322), 2024-04-24
Supplement: jamanetwopen-e248322-s001.pdf [file jamanetwopen-e248322-s001.pdf]

## Supplemental Online Content

Travers JL, Hade EM, Friedman S, Raval A, Hadson K, Falvey JR. Staffing and antipsychotic medication use in nursing homes located in deprived neighborhoods. *JAMA Netw Open*. 2024;7(4):e248322. doi:10.1001/jamanetworkopen.2024.8322

**eTable 1.** Missing Nursing Homes That Did Not Link Across Datasets

**eTable 2.** Differences in Resident Quality Care Outcomes Between Nursing Homes in Severely Deprived Neighborhoods vs. Nursing Homes in Less Deprived Neighborhoods

This supplemental material has been provided by the authors to give readers additional information about their work.

**eTable 1. Missing Nursing Homes That Did Not Link Across Datasets**

| Mean (SD) or % (Count)                             | Unmatched (n=3360)        |
|----------------------------------------------------|---------------------------|
| <b>Staffing Hours (per MDS census)</b>             |                           |
| Certified Nursing Assistant                        | 2.4 (0.6) missing=77      |
| Licensed Practical Nurse                           | 0.9 (0.5) missing=77      |
| Registered Nurse                                   | 0.8 (0.8) missing=77      |
| Total Nursing staff                                | 4.2 (1.2) missing=77      |
| <b>Nursing Home Resident Quality Care Outcomes</b> |                           |
| ADL Need Increased                                 | 13.3 (6.6) missing=351    |
| Pressure Ulcer                                     | 7.1 (4.8) missing=372     |
| Urinary Tract Infection                            | 2.7 (2.9) missing=307     |
| Depressed                                          | 3.2 (8.3) missing=312     |
| Restrained                                         | 0.4 (2.3) missing=302     |
| Falls                                              | 3.1 (2.6) missing=302     |
| Flu Vaccination                                    | 95.9 (7.4) missing=306    |
| Pneumonia Vaccination                              | 94.5 (11.1) missing=302   |
| Antipsychotic Prescription                         | 14.3 (11.7) missing=322   |
| Worsened Mobility                                  | 16.5 (7.8) missing=393    |
| Lose too much weight                               | 5.2 (3.4) missing=317     |
| Catheterized                                       | 2.2 (2.5) missing=312     |
| Lose bladder/bowel control                         | 45.9 (17.7) missing=473   |
| Antianxiety                                        | 19.1 (10.6) missing=311   |
| Alzheimer Unit                                     | 16.5% (54, 3033 missing)  |
| Chain Ownership                                    | 45.9% (150, 3033 missing) |
| <b>Nursing Home Characteristics</b>                |                           |
| Certified Bed Size                                 | 100.3 (71.9)              |
| Organization Ownership Status                      |                           |
| For Profit                                         | 67.4% (2266)              |
| Government                                         | 9.6% (324)                |
| Non Profit                                         | 22.9% (770)               |
| Acuity index                                       | 12.4 (1.3) missing=3033   |
| Rural Code                                         |                           |
| Metro                                              | 51% (597)                 |
| Non-metro – adjacent to metro                      | 26.2 (307)                |
| Non-metro – not adjacent to metro                  | 22.8 (267)                |



eTable 2. Differences in Resident Quality Care Outcomes Between Nursing Homes in Severely Deprived Neighborhoods vs. Nursing Homes in Less Deprived Neighborhoods

| <b>Nursing Home Resident Quality Care Outcomes</b> | <b>Less Deprived<br/>(n=9099)</b> | <b>Severely Deprived<br/>(n=1867)</b> | <b>Mean difference or Odds Ratio<br/>(95% CI)</b> |
|----------------------------------------------------|-----------------------------------|---------------------------------------|---------------------------------------------------|
| ADL Need Increased, mean (SD)                      | 14.7 (6.1)                        | 15.6 (6.1)                            | -0.82 (-1.12, -0.51)                              |
| Pressure Ulcer, mean (SD)                          | 7.3 (4.2)                         | 7.7 (4.4)                             | -0.42 (-0.64, -0.20)                              |
| Urinary Tract Infection, mean (SD)                 | 2.7 (2.7)                         | 2.8 (2.7)                             | -0.12 (-0.25, 0.02)                               |
| Depressed, mean (SD)                               | 5 (10.9)                          | 5.2 (10.7)                            | -0.17 (-0.71, 0.37)                               |
| Restrained, mean (SD)                              | 0.2 (1.3)                         | 0.3 (1.2)                             | -0.05 (-0.11, 0.01)                               |
| Falls, mean (SD)                                   | 3.4 (2.3)                         | 3.5 (2.3)                             | -0.12 (-0.24, -0.01)                              |
| Flu Vaccination, mean (SD)                         | 95.7 (6.7)                        | 95.7 (6.9)                            | -0.08 (-0.42, 0.26)                               |
| Pneumonia Vaccination, mean (SD)                   | 93.4 (11.9)                       | 93.2 (12.7)                           | 0.18 (-0.45, 0.80)                                |
| Antipsychotic Prescription, mean (SD)              | 14.2 (8.8)                        | 15.9 (10.7)                           | -1.78 (-2.3, -1.26)                               |
| Worsened Mobility, mean (SD)                       | 18 (7.3)                          | 17.8 (7.5)                            | 0.29 (-0.08, 0.65)                                |
| Antianxiety, mean (SD)                             | 19.9 (9.7)                        | 23 (10.6)                             | -3.11 (-3.63, -2.58)                              |
| Lose bladder/bowel control, mean (SD)              | 50.2 (17.1)                       | 45 (17.3)                             | 5.21 (4.35, 6.06)                                 |
| Lose too much weight, mean (SD)                    | 5.4 (3.2)                         | 5.8 (3.5)                             | -0.36 (-0.54, -0.19)                              |
| Catheterized, mean (SD)                            | 1.9 (2)                           | 2 (1.8)                               | -0.04 (-0.13, 0.05)                               |
| Alzheimer Unit, n (%)                              | 1317 (14.5)                       | 250 (13.4)                            | 0.91 (0.79, 1.06)                                 |
| Chain Ownership, n (%)                             | 5523 (60.7)                       | 1173 (62.8)                           | 1.09 (0.99, 1.21)                                 |
