# Supplementary material for: Staffing and Antipsychotic Medication Use in Nursing Homes and Neighborhood Deprivation
Source: PubMed Central journal article supplement (PMC11043897; doi:10.1001/jamanetworkopen.2024.8322), 2024-04-24
Supplement: jamanetwopen-e248322-s002.pdf [file jamanetwopen-e248322-s002.pdf]

## Data Sharing Statement

Travers. Staffing and Antipsychotic Medication Use in Nursing Homes and Neighborhood Deprivation. *JAMA Netw Open*. Published April 24, 2024.

doi:10.1001/jamanetworkopen.2024.8322

### Data

**Data available:** Yes

**Data types:** Deidentified participant data

**How to access data:** Data will be made available upon reasonable request

**When available:** With publication

### Supporting Documents

**Document types:** None

### Additional Information

**Who can access the data:** Upon reasonable request

**Types of analyses:** for any purpose

**Mechanisms of data availability:** with reasonable request

**Any additional restrictions:** n/a
